# Supplementary material for: Pharmacological targets and mechanisms of calycosin against meningitis
Source: PubMed Central journal article supplement (PMC7732281; doi:10.18632/aging.103886), 2020-10-08
Supplement: aging-12-103886-s001..pdf [file aging-12-103886-s001..pdf]

SUPPLEMENTARY FIGURE

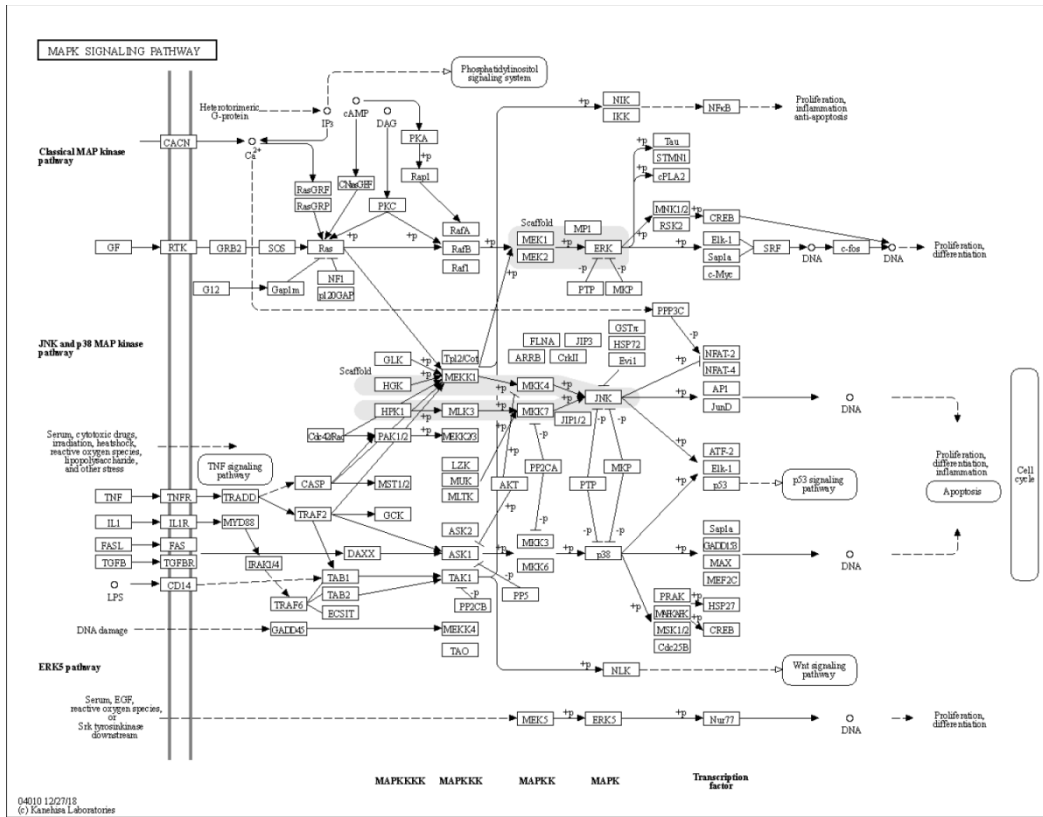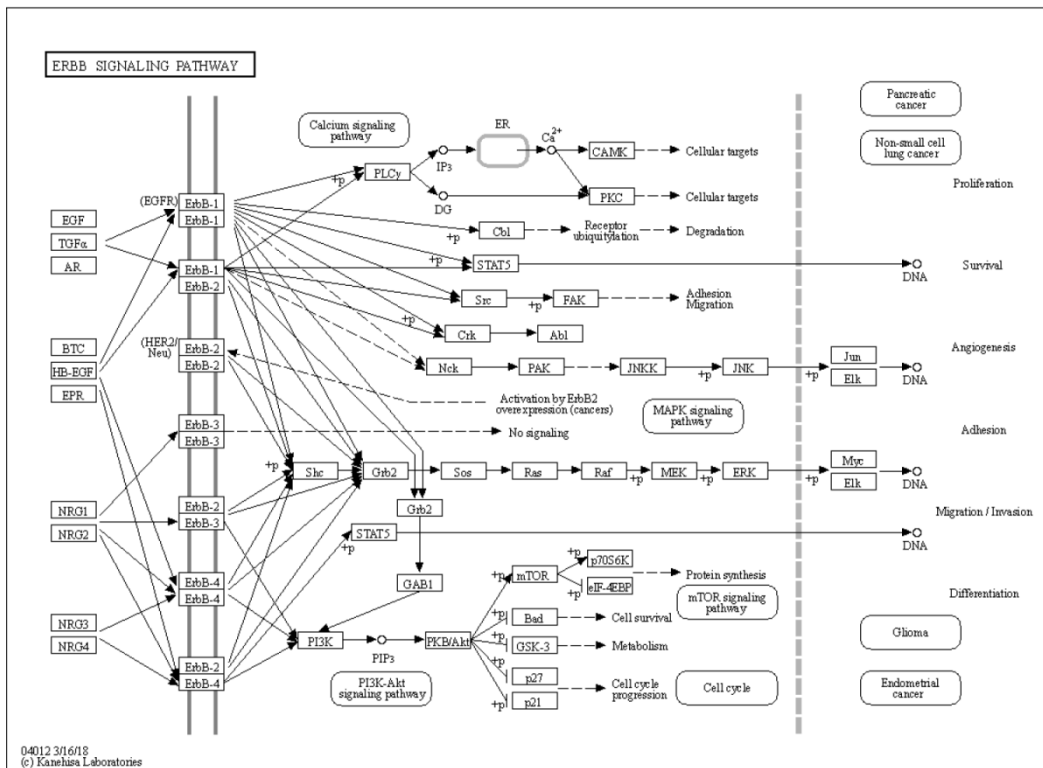

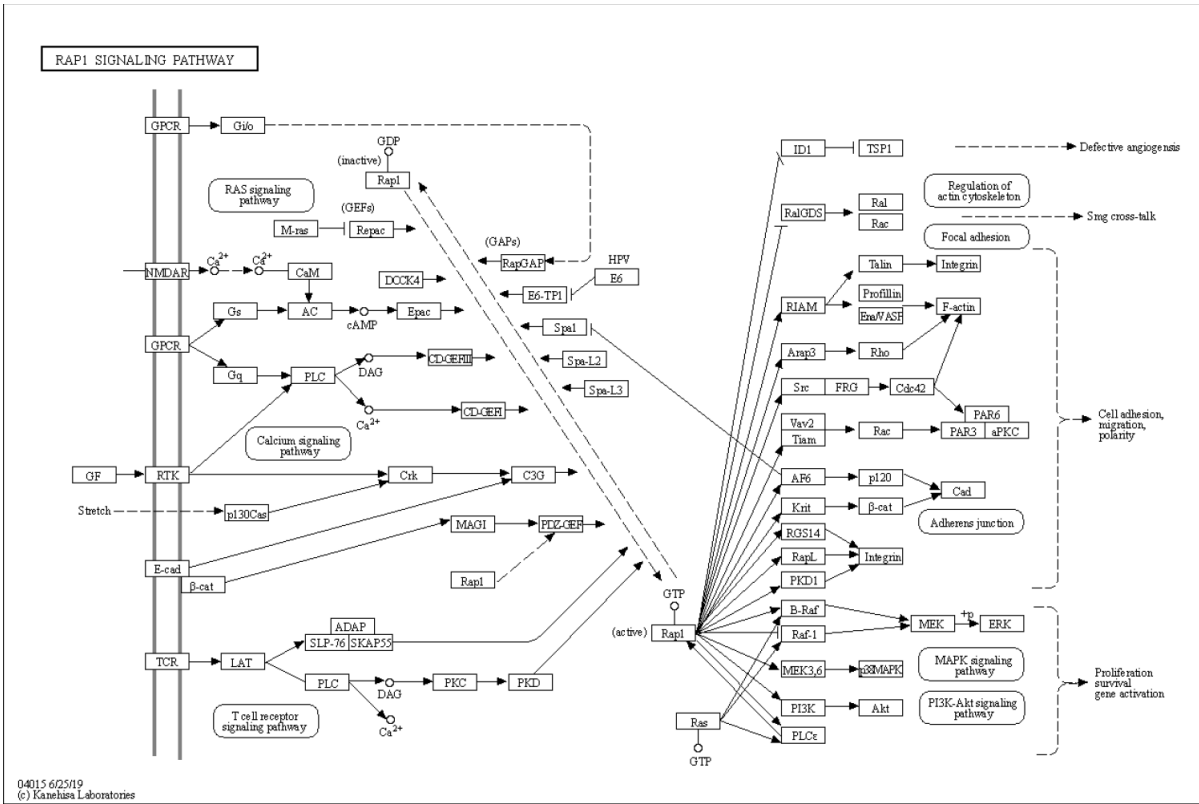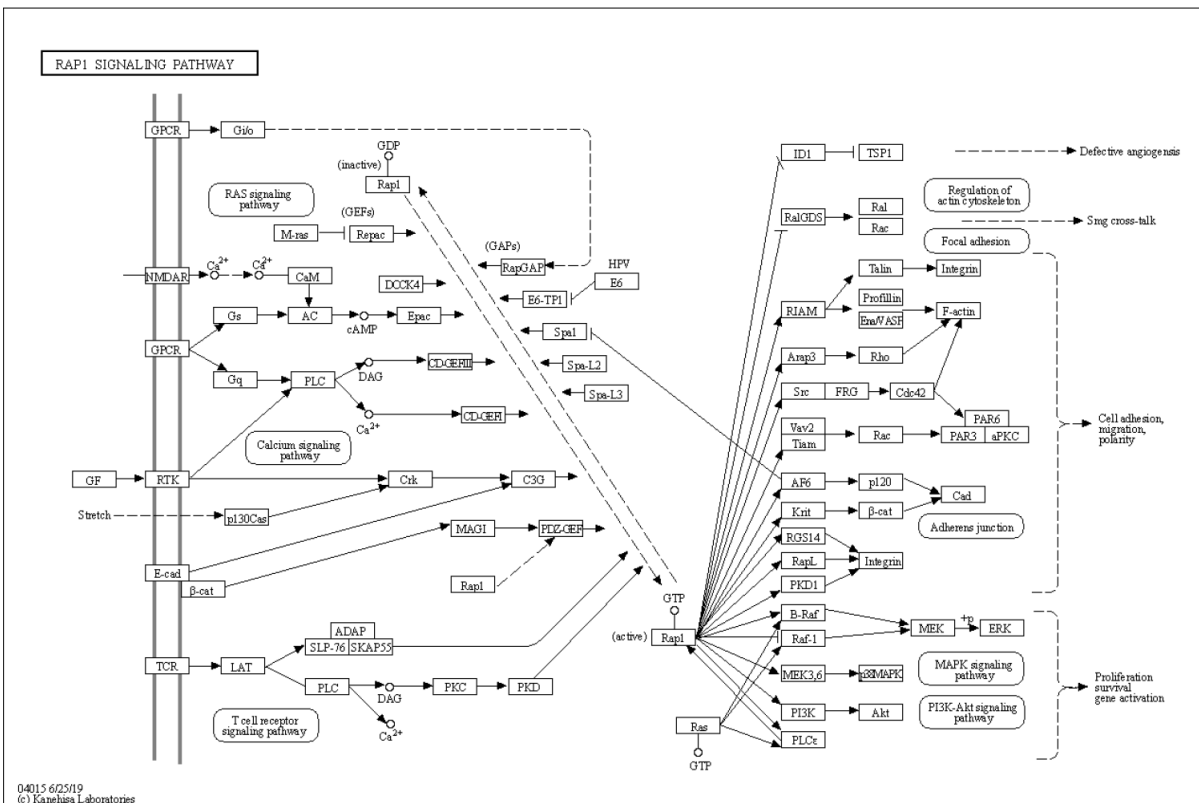

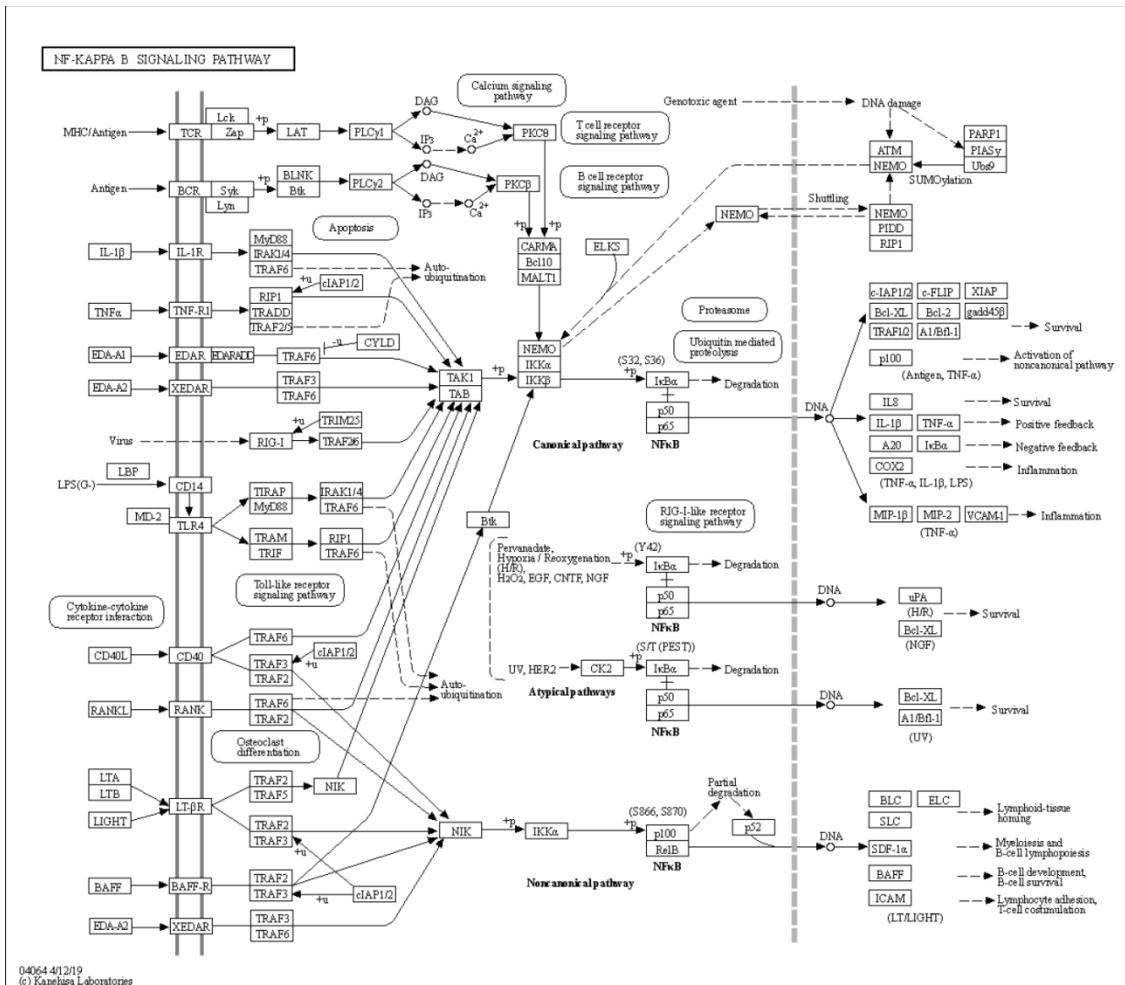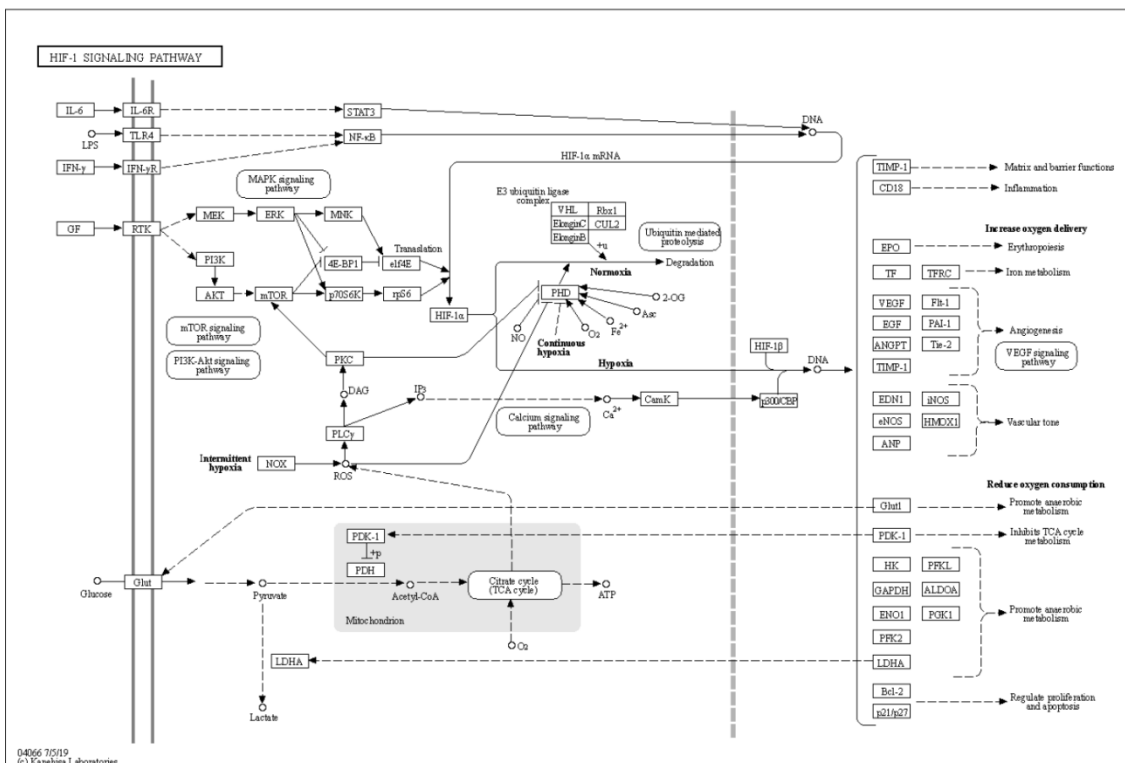

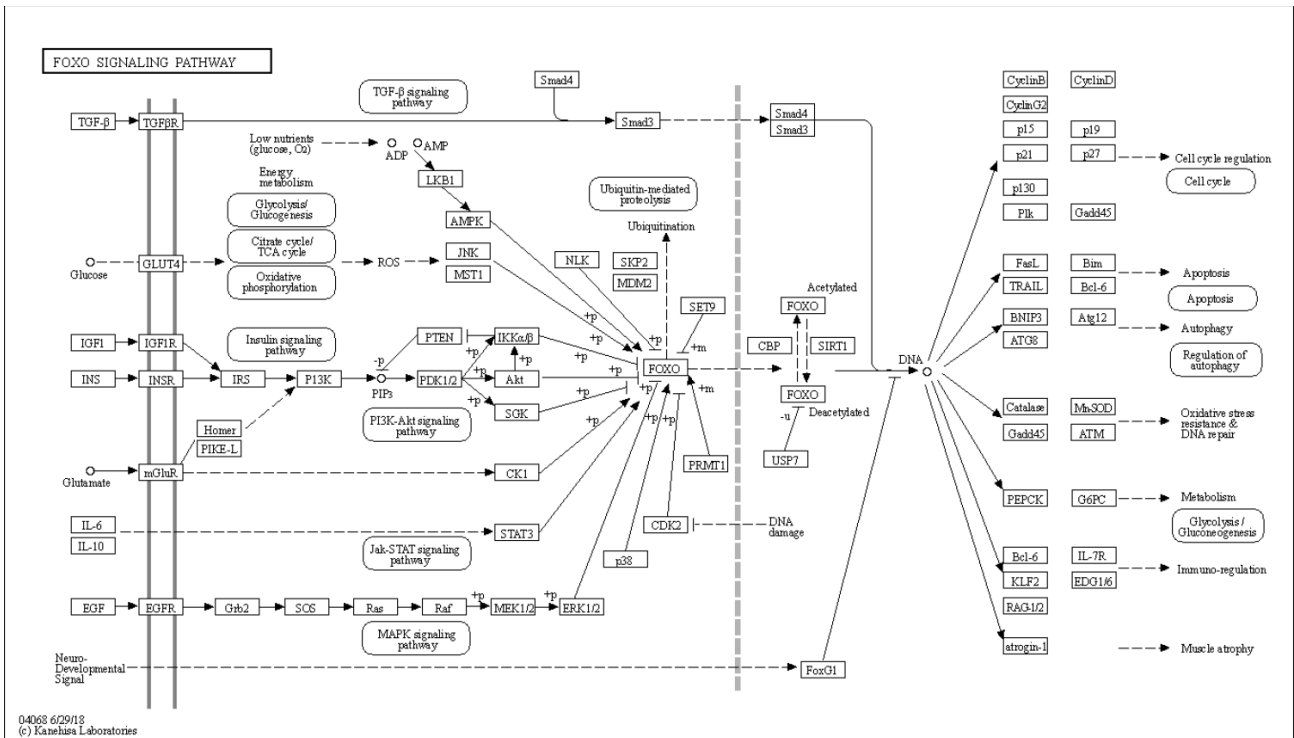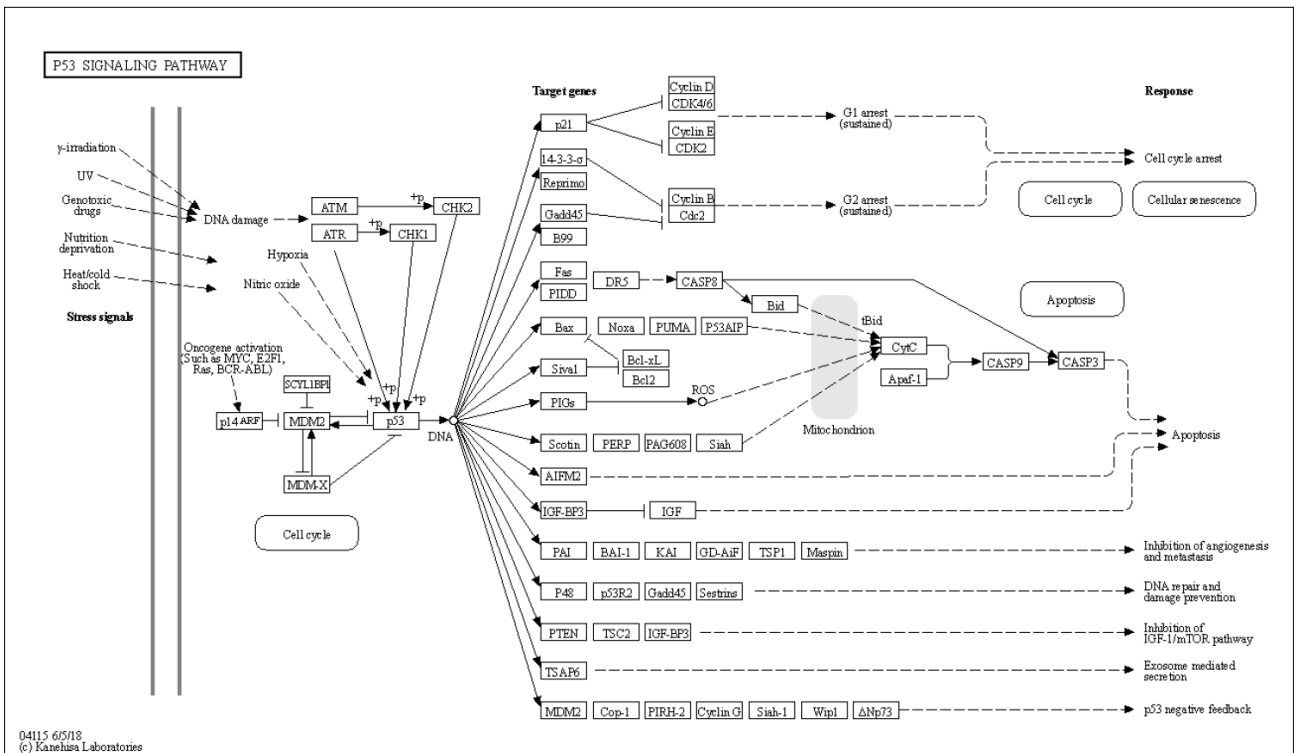

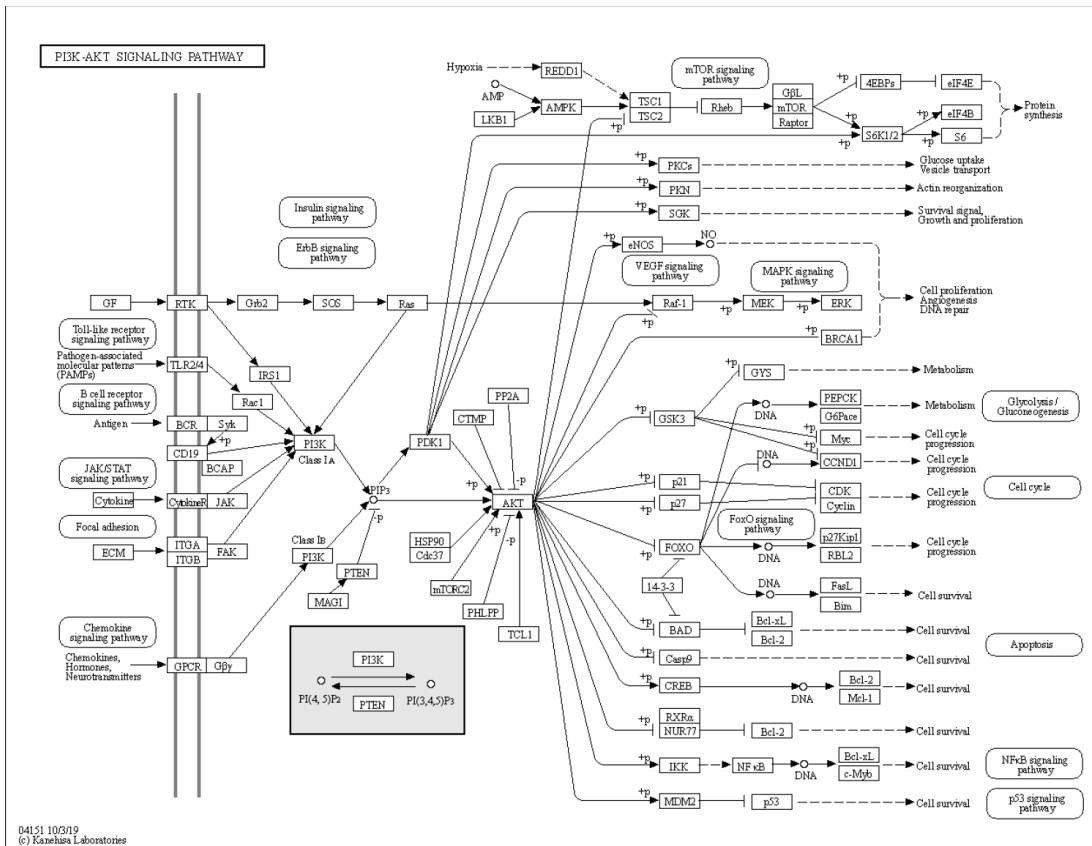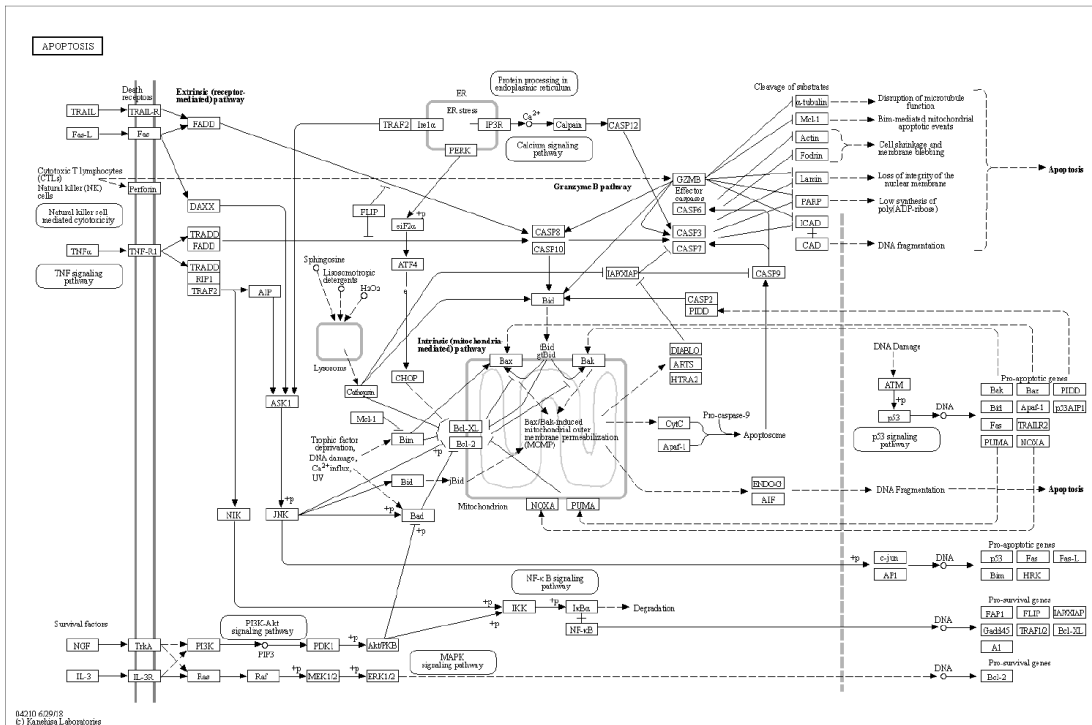

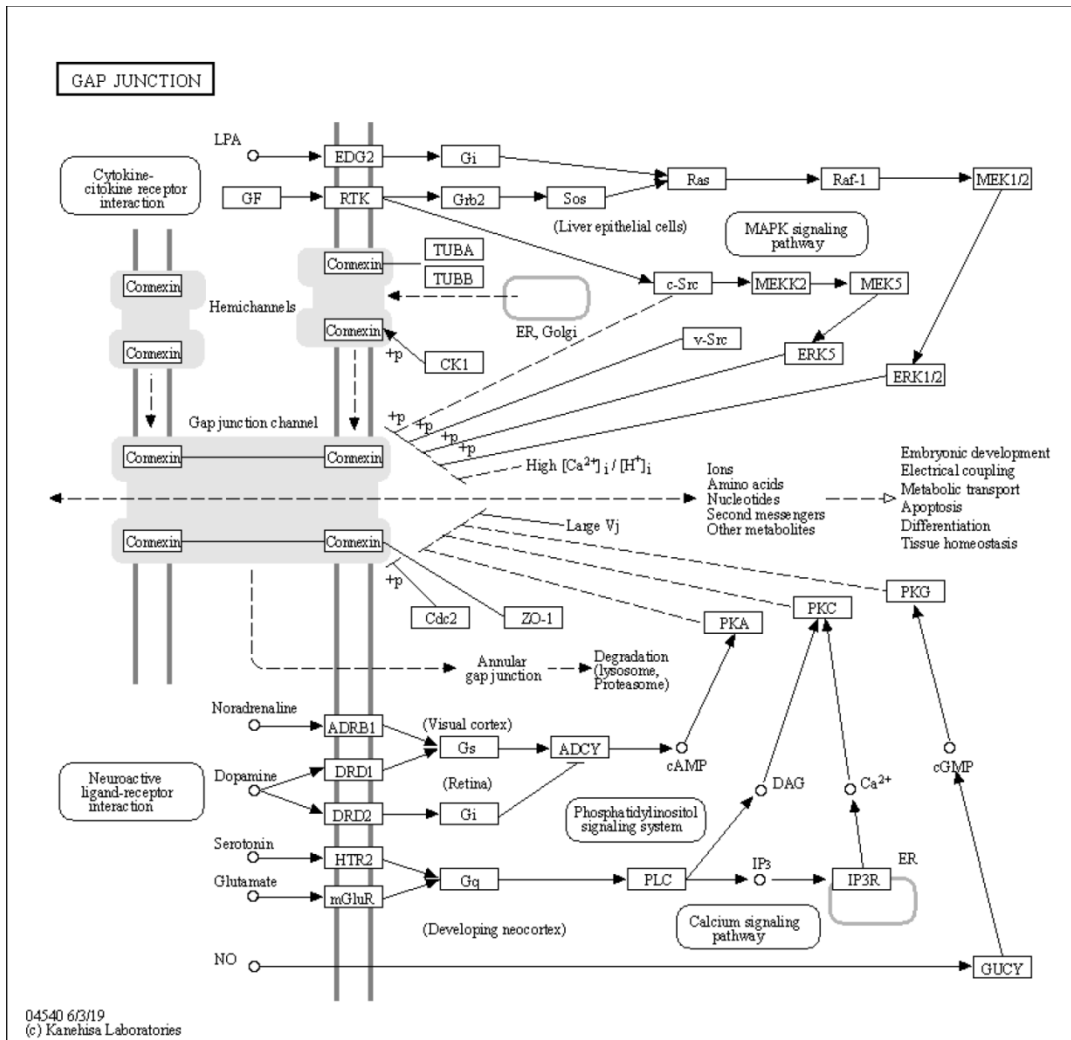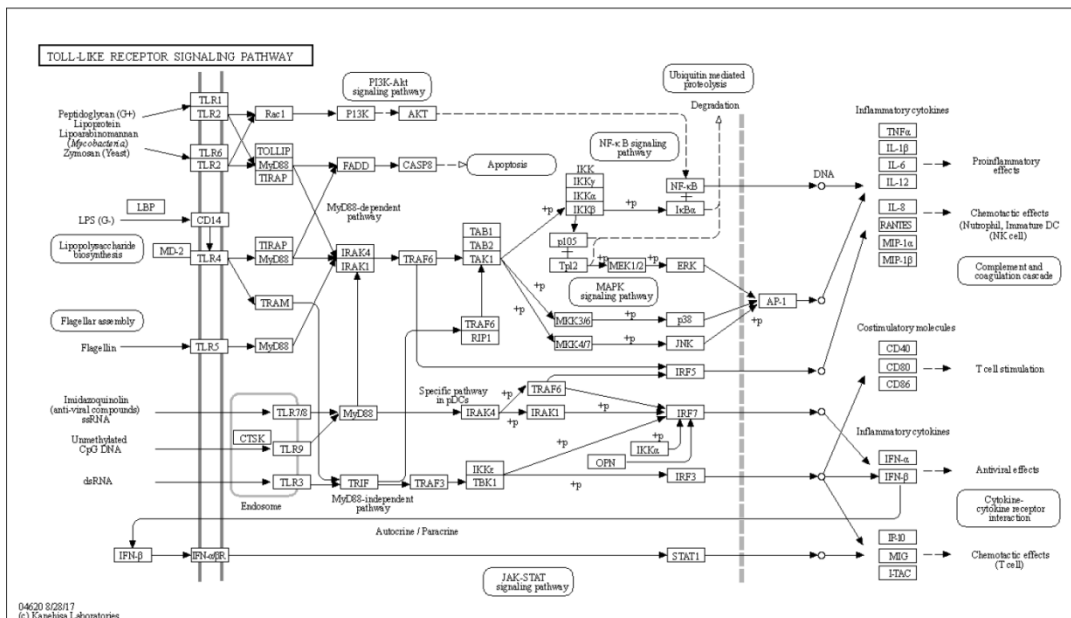

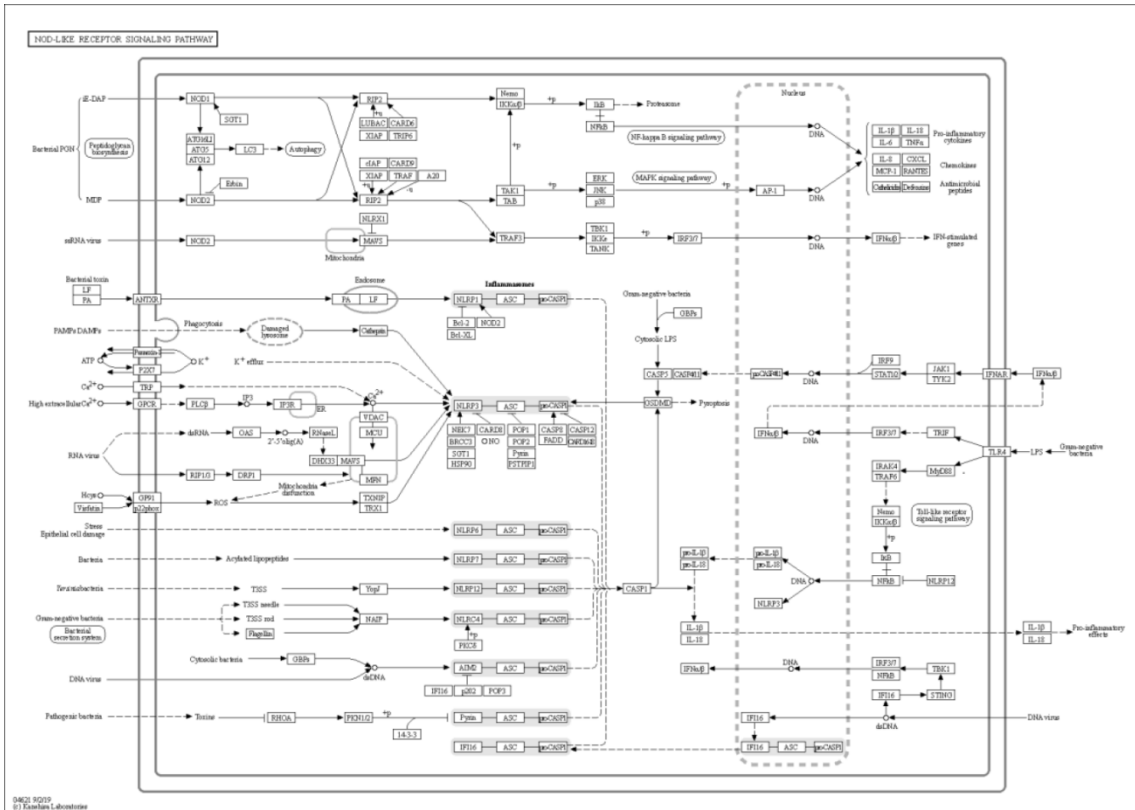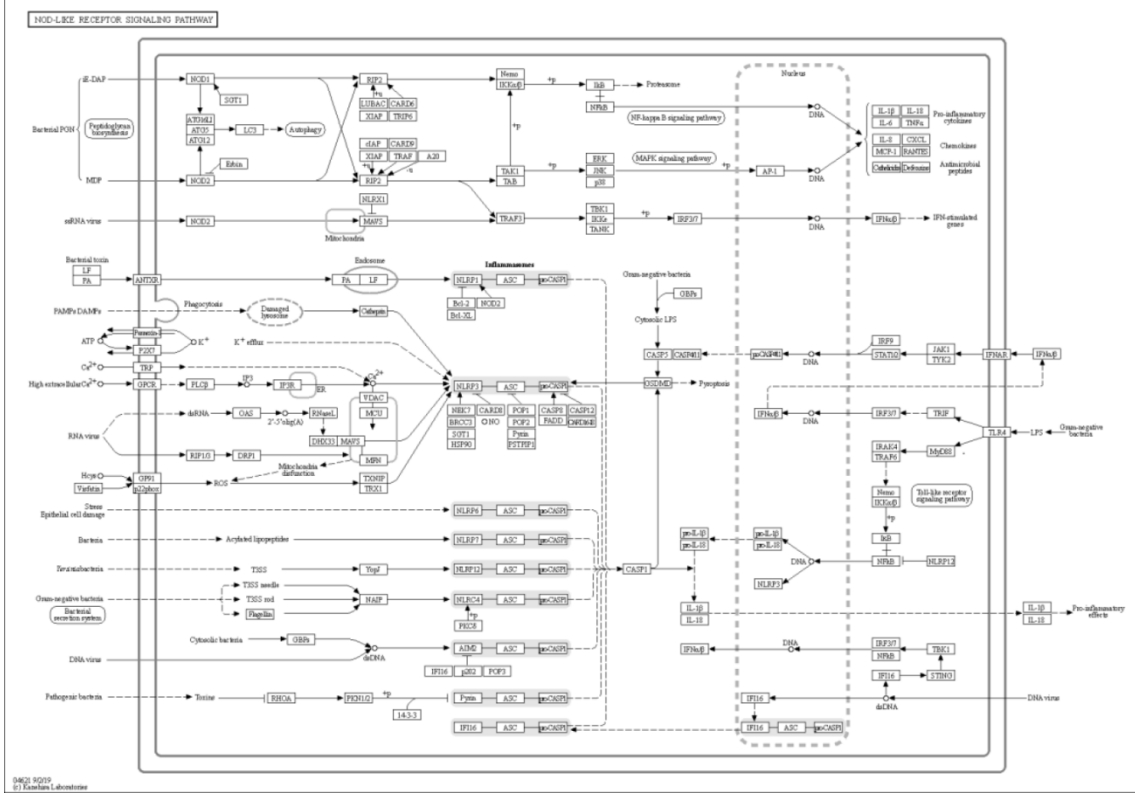

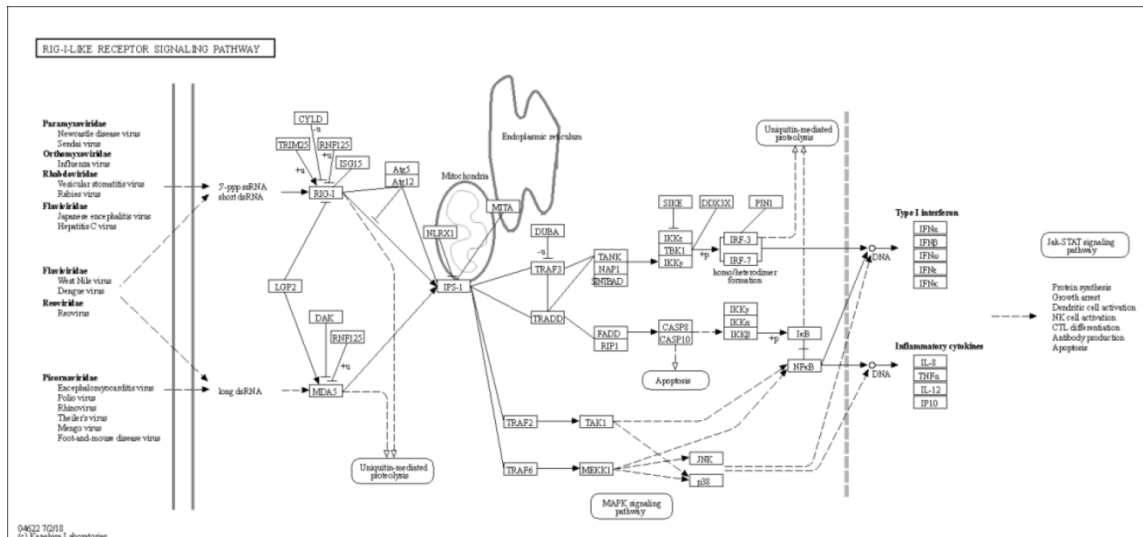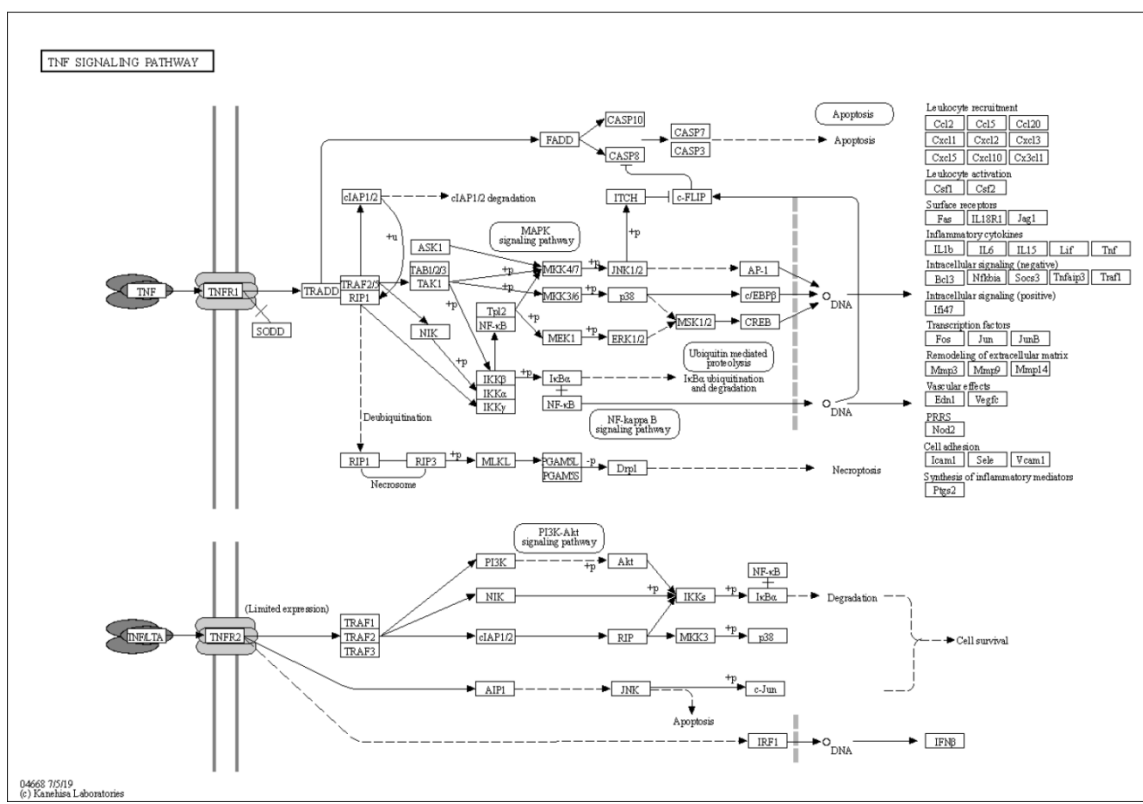



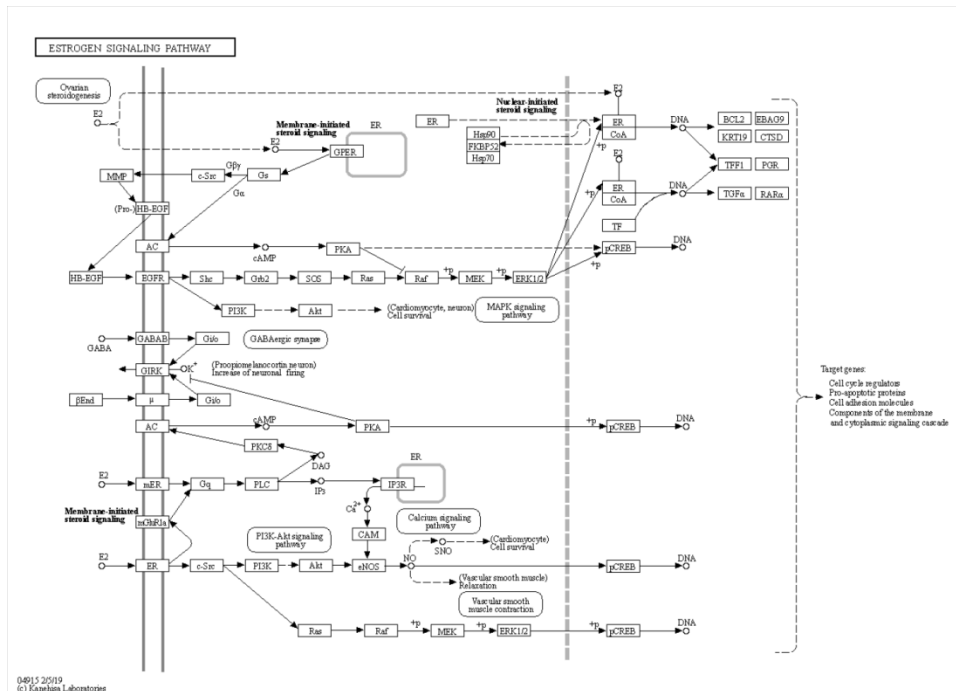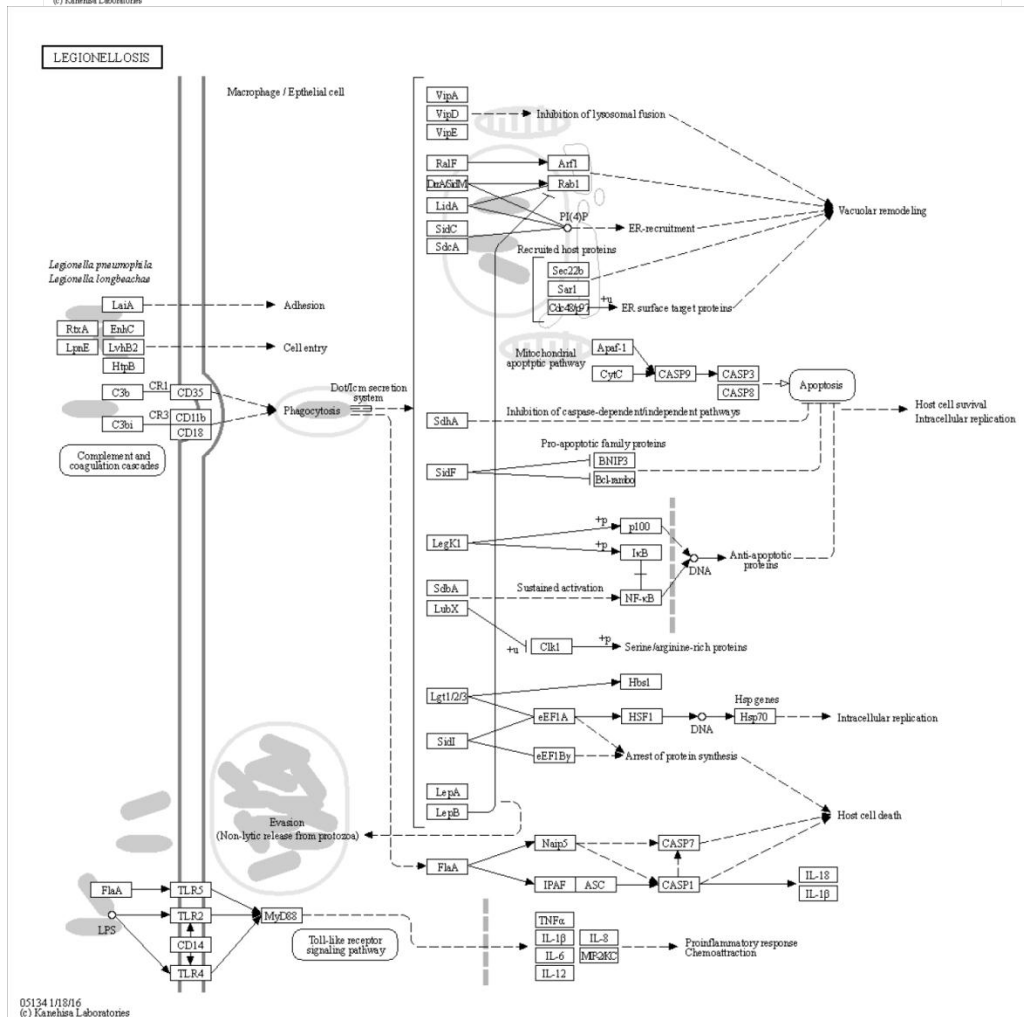

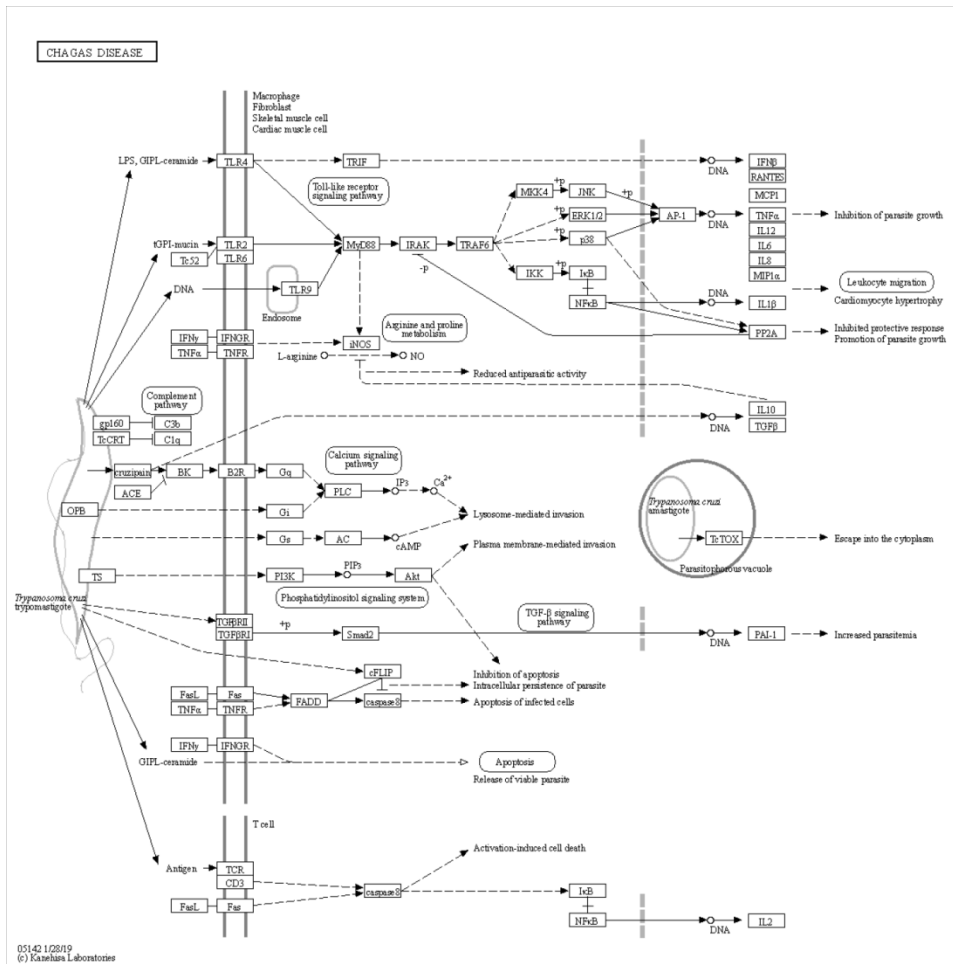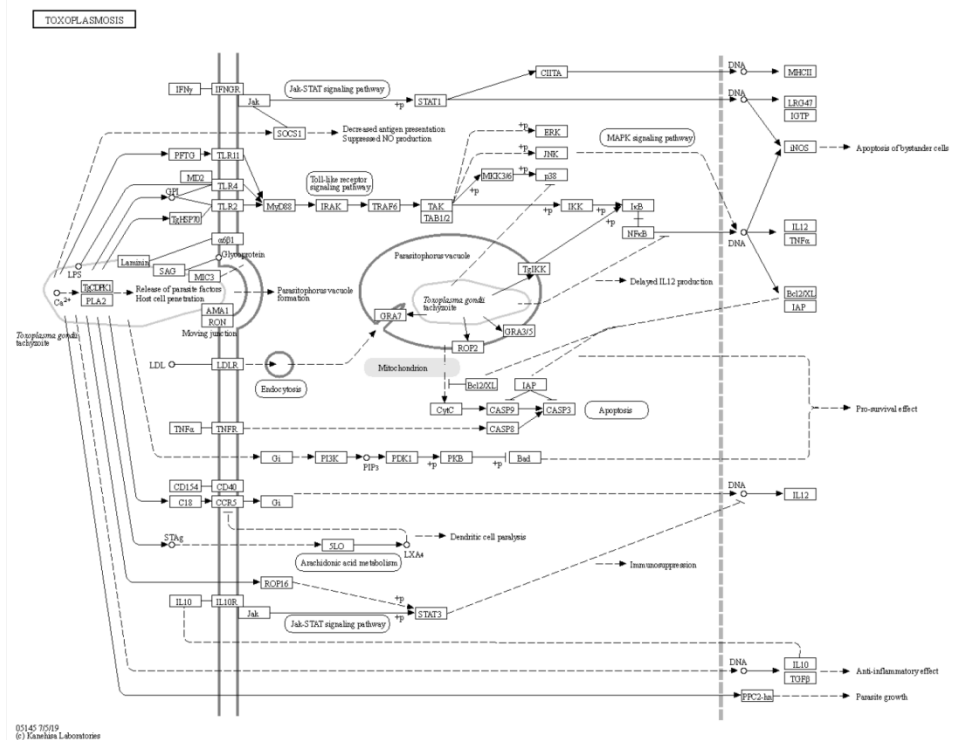

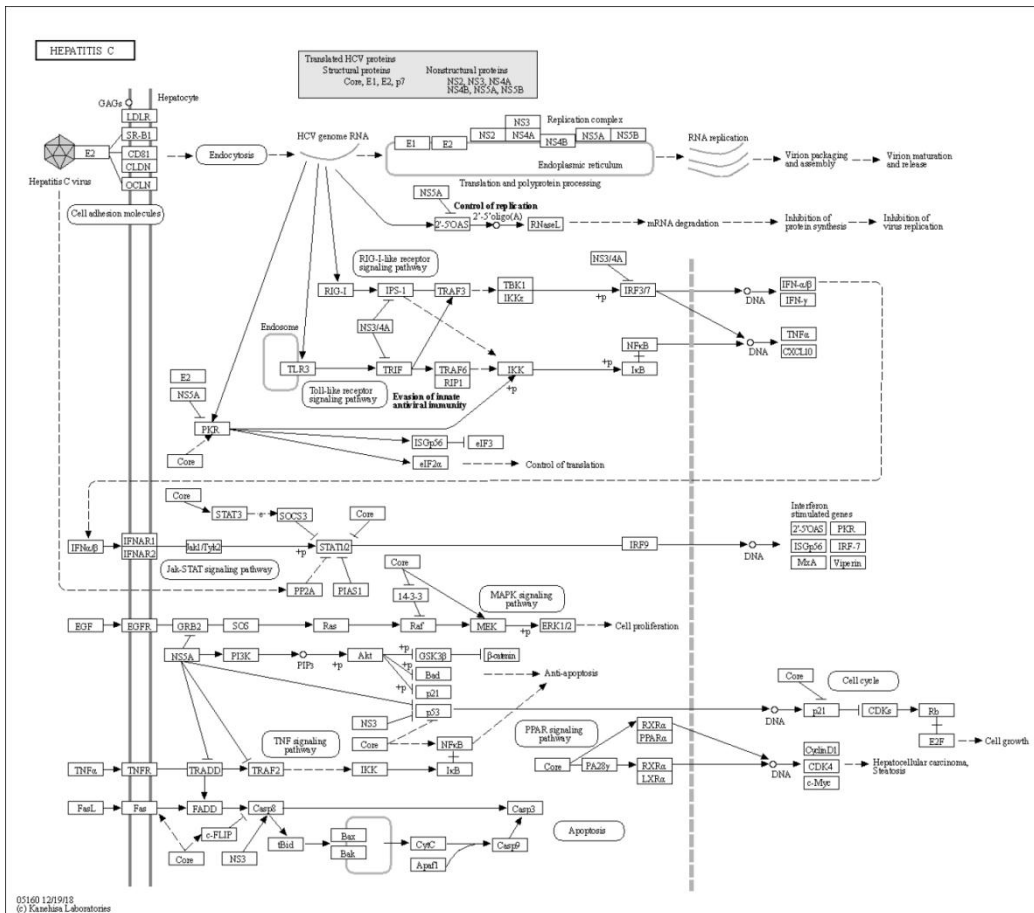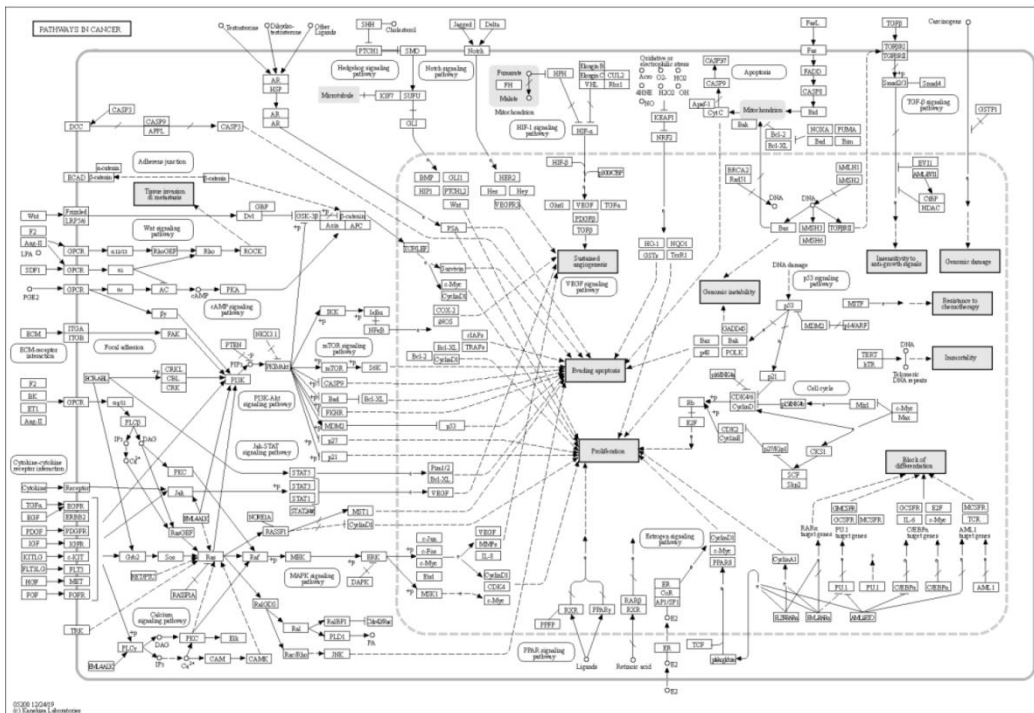

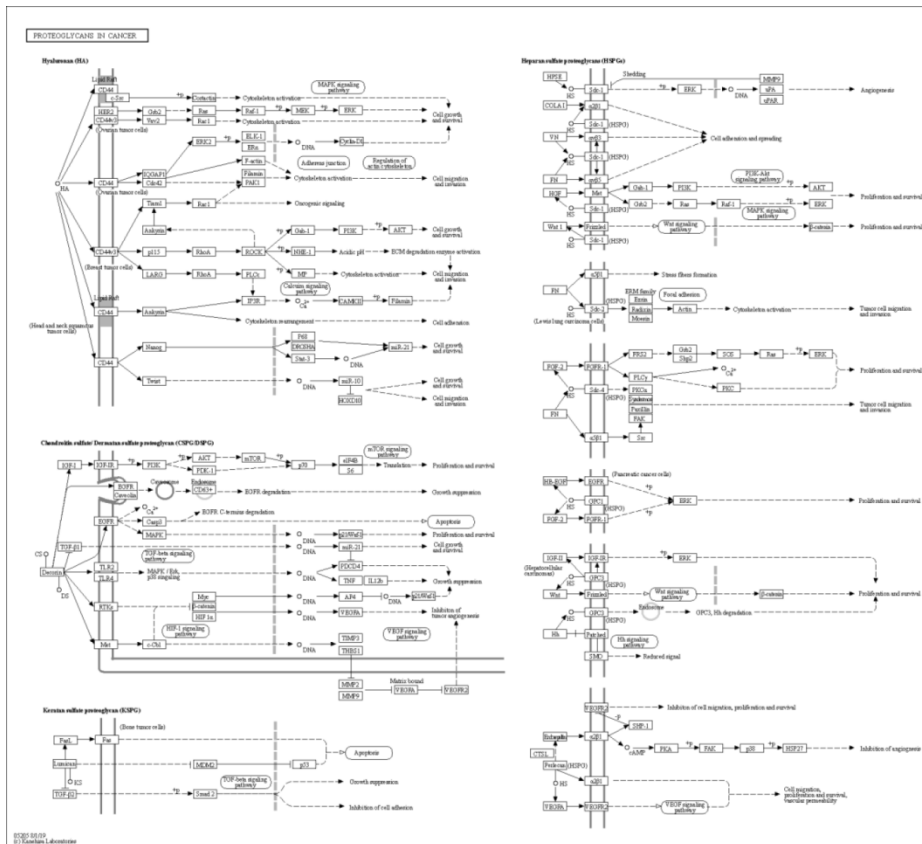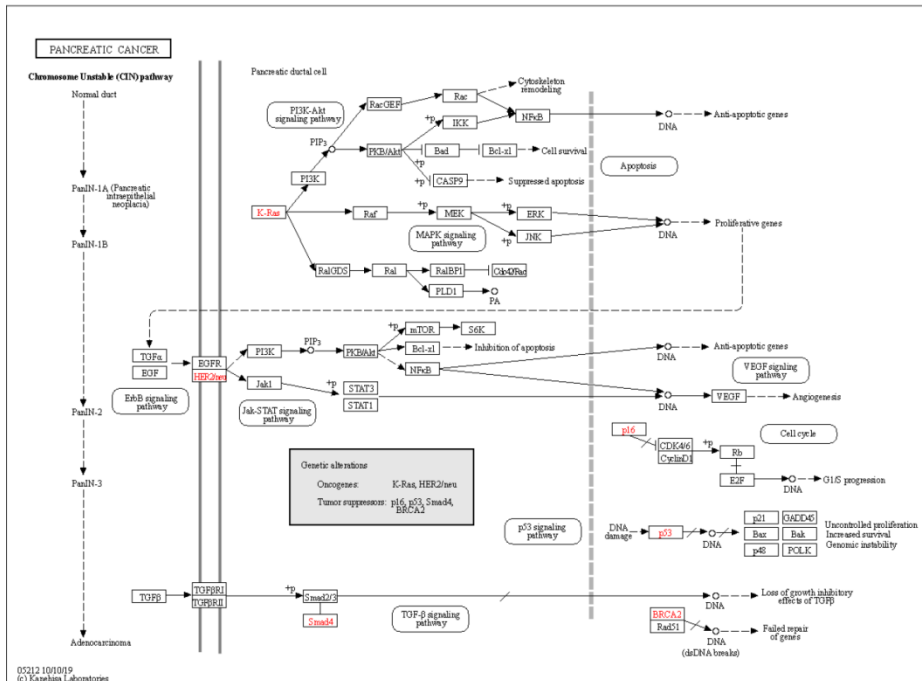

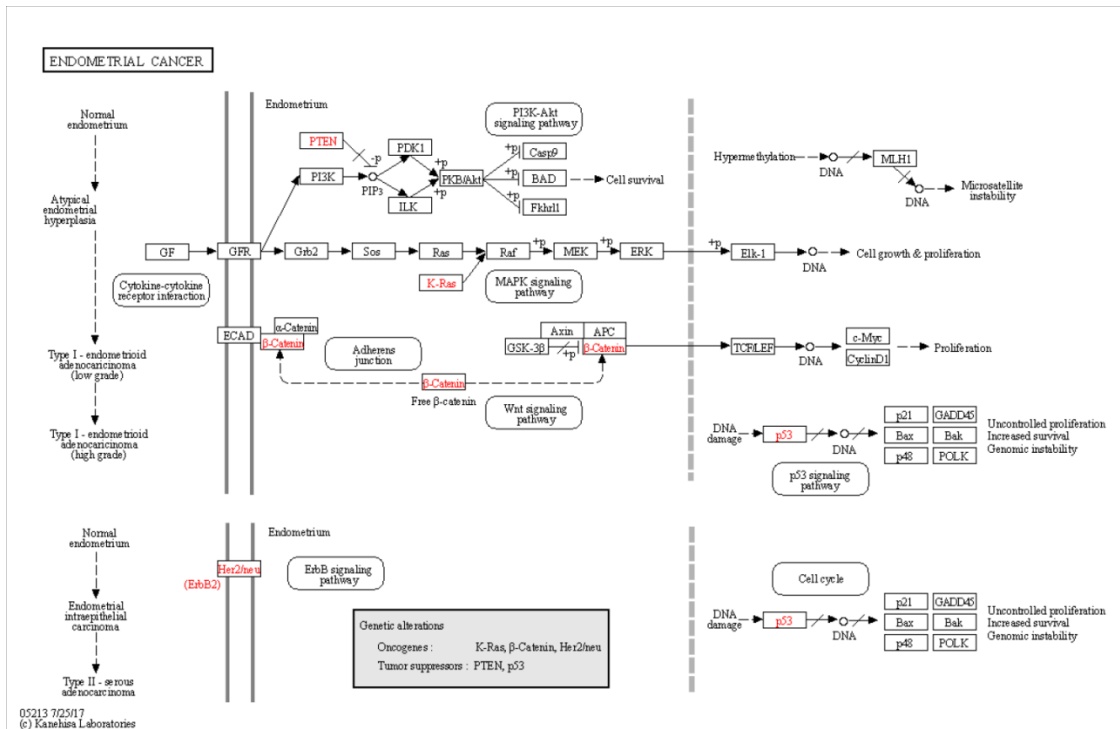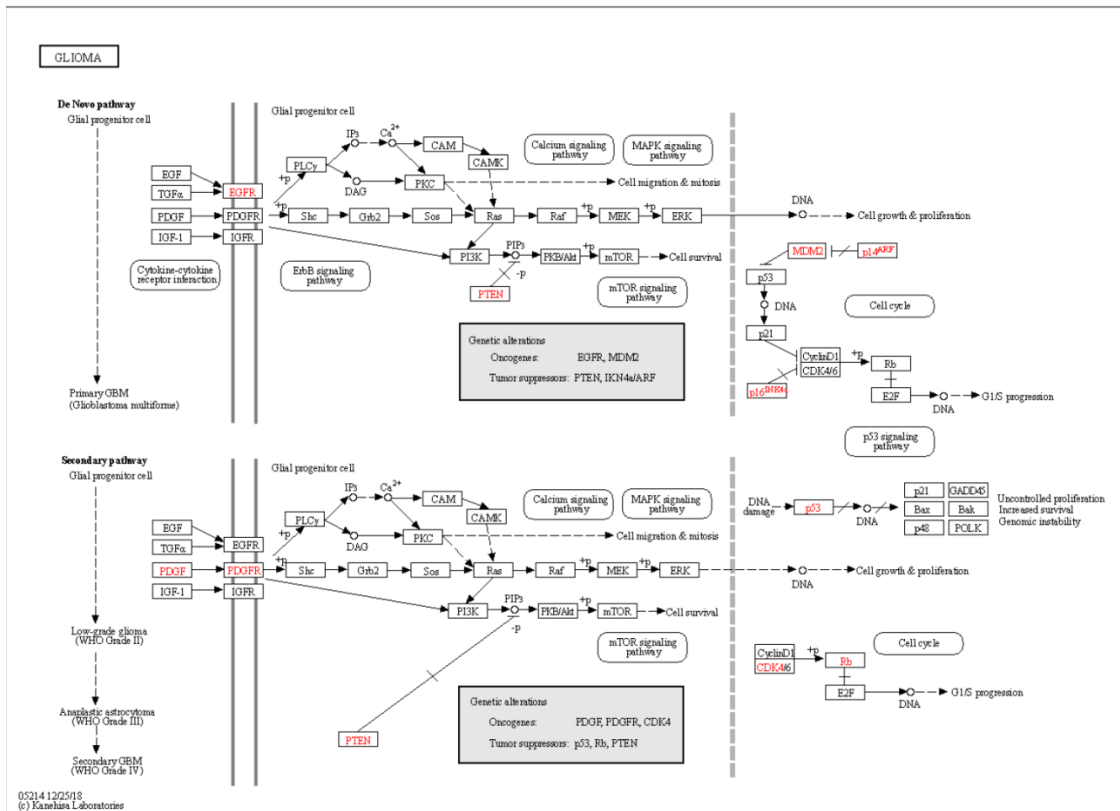

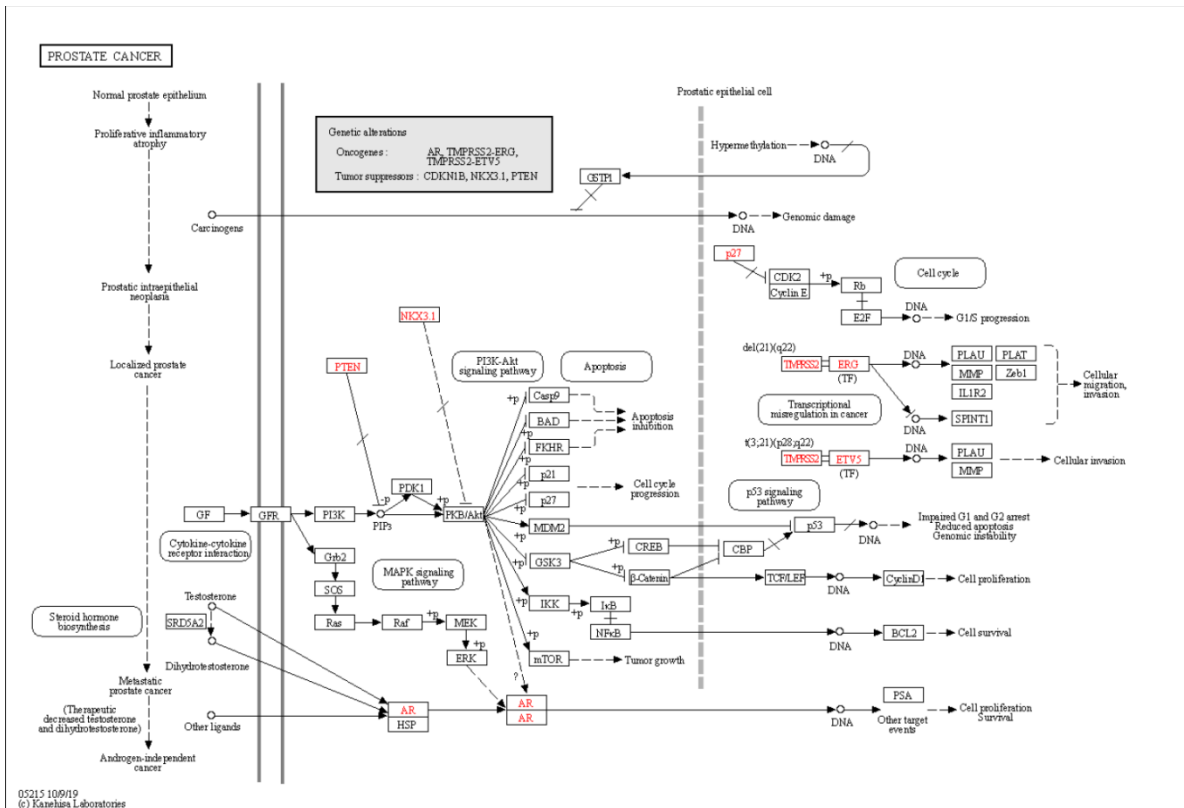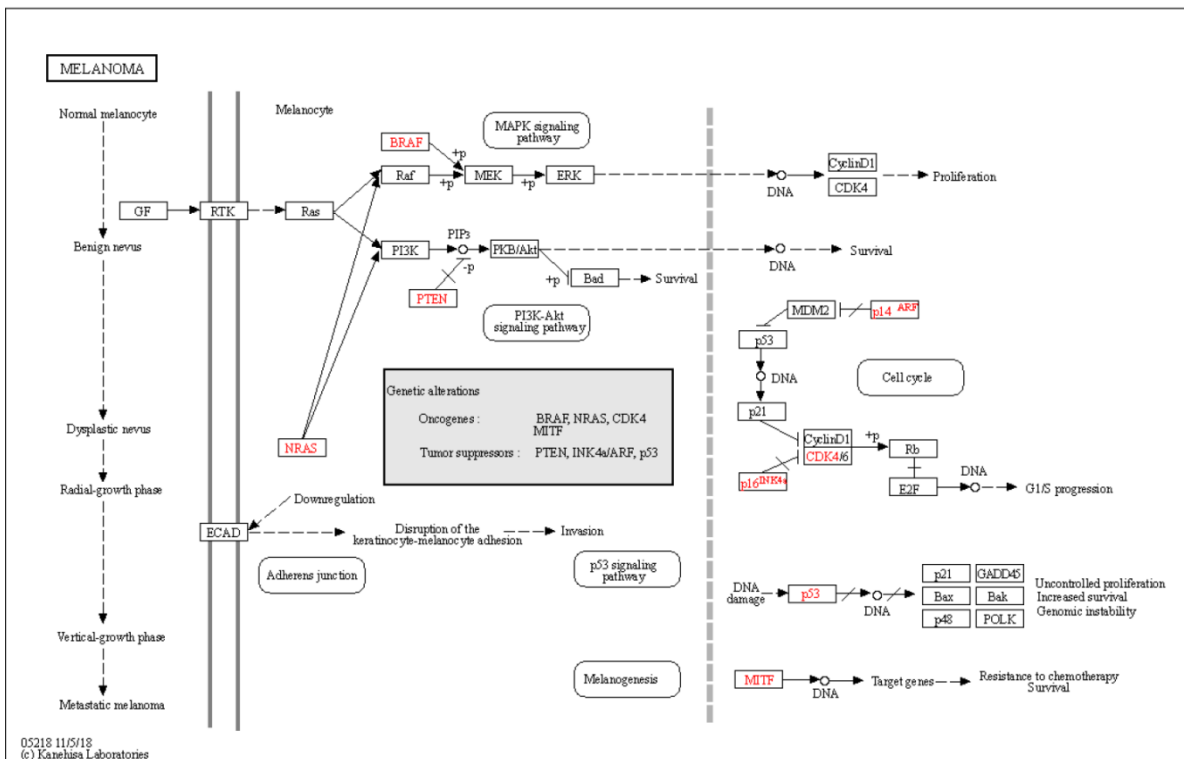

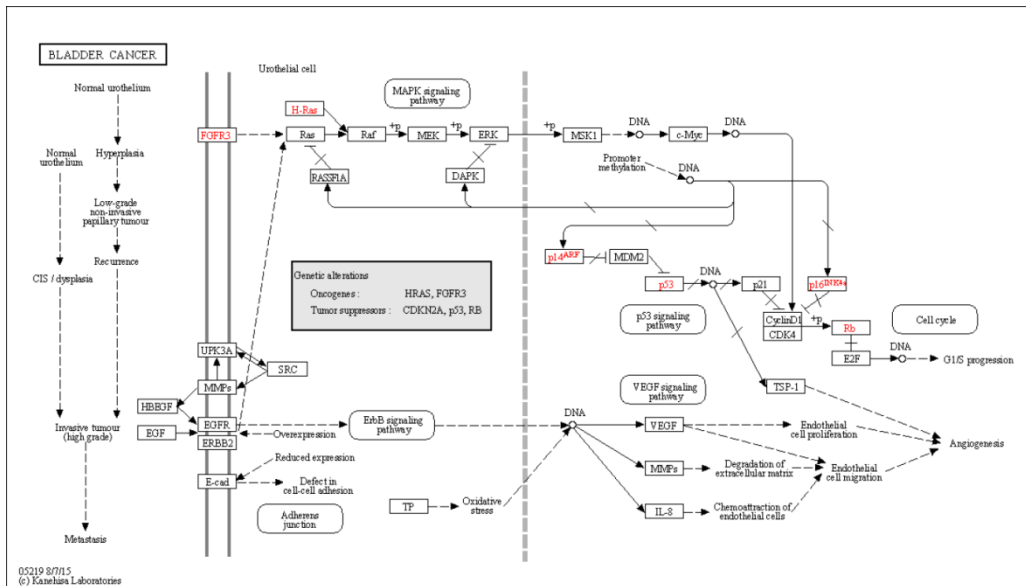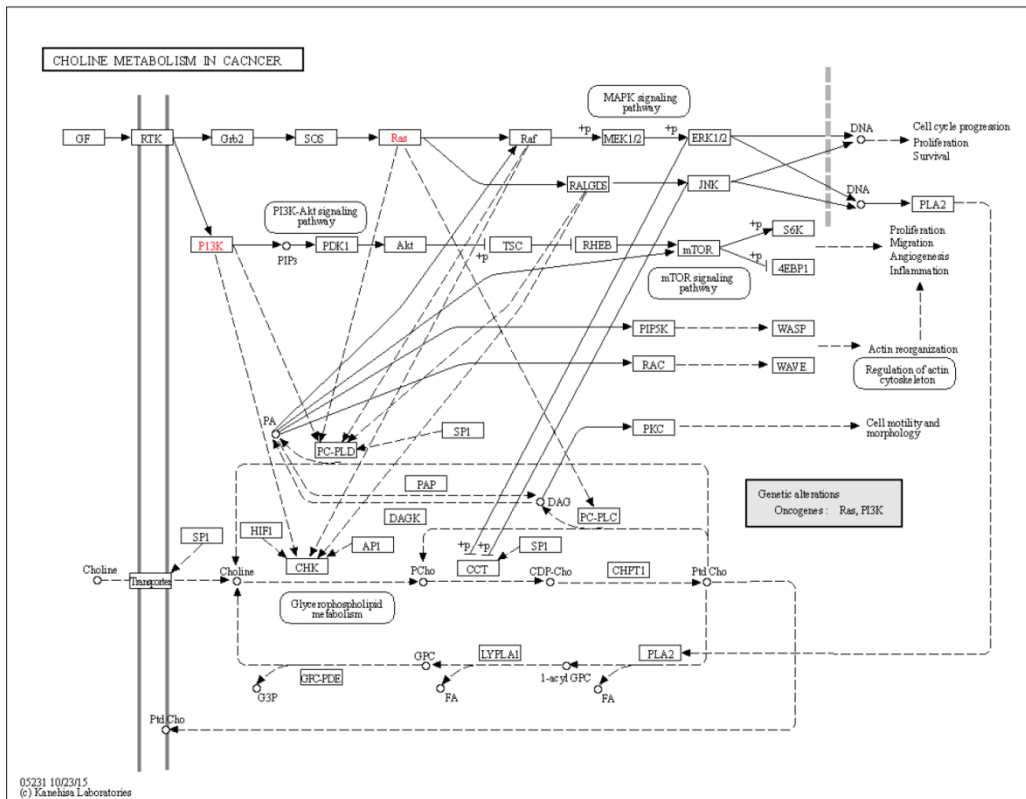

Supplementary Figure 1. More other molecular pathways of the core targets.
