# Supplementary material for: Pharmacological targets and mechanisms of calycosin against meningitis
Source: Aging (Albany NY). 2020 Oct 8;12(19):19468–92. doi: 10.18632/aging.103886 (PMC7732281; doi:10.18632/aging.103886)
Supplement: Supplementary Table 1 [file aging-12-103886-s002..xls]

## Sheet: Sheet1
Supplementary Table 1. More details of the KEGG signaling pathways of the core targets.
Category		Term	P Value	Genes
KEGG_PATHWAY	hsa04210	Apoptosis	1.37e-05	TNF, CASP8, ATM, NGF
KEGG_PATHWAY	hsa04010	MAPK signaling pathway	0.000905	EGFR, TNF, EGF, NGF
KEGG_PATHWAY	hsa05160	Hepatitis C	0.00528905	EGFR, TNF, EGF
KEGG_PATHWAY	hsa04068	FoxO signaling pathway	0.00536709	EGFR, EGF, ATM
KEGG_PATHWAY	hsa05205	Proteoglycans in cancer	0.0116799	EGFR, TNF, ESR1
KEGG_PATHWAY	hsa04015	Rap1 signaling pathway	0.0128297	EGFR, EGF, NGF
KEGG_PATHWAY	hsa04014	Ras signaling pathway	0.014771	EGFR, EGF, NGF
KEGG_PATHWAY	hsa04151	PI3K-Akt signaling pathway	0.0328938	EGFR, EGF, NGF
KEGG_PATHWAY	hsa05219	Bladder cancer	0.035245	EGFR, EGF
KEGG_PATHWAY	hsa05200	Pathways in cancer	0.0418941	EGFR, CASP8, EGF
KEGG_PATHWAY	hsa05213	Endometrial cancer	0.0445228	EGFR, EGF
KEGG_PATHWAY	hsa05134	Legionellosis	0.0462016	TNF, CASP8
KEGG_PATHWAY	hsa04621	NOD-like receptor signaling pathway	0.047878	TNF, CASP8
KEGG_PATHWAY	hsa05223	Non-small cell lung cancer	0.047878	EGFR, EGF
KEGG_PATHWAY	hsa05212	Pancreatic cancer	0.0553914	EGFR, EGF
KEGG_PATHWAY	hsa05214	Glioma	0.0553914	EGFR, EGF
KEGG_PATHWAY	hsa04115	p53 signaling pathway	0.0570544	CASP8, ATM
KEGG_PATHWAY	hsa04622	RIG-I-like receptor signaling pathway	0.0595442	TNF, CASP8
KEGG_PATHWAY	hsa05218	Melanoma	0.0603729	EGFR, EGF
KEGG_PATHWAY	hsa04064	NF-kappa B signaling pathway	0.0735498	TNF, ATM
KEGG_PATHWAY	hsa04012	ErbB signaling pathway	0.0735498	EGFR, EGF
KEGG_PATHWAY	hsa05215	Prostate cancer	0.0743682	EGFR, EGF
KEGG_PATHWAY	hsa04540	Gap junction	0.0743682	EGFR, EGF
KEGG_PATHWAY	hsa04066	HIF-1 signaling pathway	0.0808939	EGFR, EGF
KEGG_PATHWAY	hsa04915	Estrogen signaling pathway	0.0833312	EGFR, ESR1
KEGG_PATHWAY	hsa05231	Choline metabolism in cancer	0.084953	EGFR, EGF
KEGG_PATHWAY	hsa05142	Chagas disease (American trypanosomiasis)	0.0873812	TNF, CASP8
KEGG_PATHWAY	hsa04620	Toll-like receptor signaling pathway	0.0889971	TNF, CASP8
KEGG_PATHWAY	hsa04668	TNF signaling pathway	0.0898041	TNF, CASP8
KEGG_PATHWAY	hsa05145	Toxoplasmosis	0.0922216	TNF, CASP8
GOTERM_BP_DIRECT	GO:0045429	positive regulation of nitric oxide biosynthetic process	9.54554e-05	EGFR, TNF, ESR1
GOTERM_BP_DIRECT	GO:0000186	activation of MAPKK activity	0.000109357	EGFR, EGF, NGF
GOTERM_BP_DIRECT	GO:0043406	positive regulation of MAP kinase activity	0.000180409	EGFR, TNF, EGF
GOTERM_BP_DIRECT	GO:0006919	activation of cysteine-type endopeptidase activity involved in apoptotic process	0.000357447	TNF, CASP8, NGF
GOTERM_BP_DIRECT	GO:0048015	phosphatidylinositol-mediated signaling	0.000582404	EGFR, EGF, NGF
GOTERM_BP_DIRECT	GO:0042981	regulation of apoptotic process	0.00232292	CASP8, ESR1, ATM
GOTERM_BP_DIRECT	GO:0071550	death-inducing signaling complex assembly	0.00285553	TNF, CASP8
GOTERM_BP_DIRECT	GO:0000165	MAPK cascade	0.00349029	EGFR, TNF, EGF
GOTERM_BP_DIRECT	GO:0035413	positive regulation of catenin import into nucleus	0.00428074	EGFR, EGF
GOTERM_BP_DIRECT	GO:0043065	positive regulation of apoptotic process	0.00455064	TNF, ATM, NGF
GOTERM_BP_DIRECT	GO:0007165	signal transduction	0.00562634	EGFR, ESR1, EGF, ATM
GOTERM_BP_DIRECT	GO:0060749	mammary gland alveolus development	0.00605987	ESR1, EGF
GOTERM_BP_DIRECT	GO:0042327	positive regulation of phosphorylation	0.00890096	EGFR, EGF
GOTERM_BP_DIRECT	GO:2000145	regulation of cell motility	0.00996463	EGFR, EGF
GOTERM_BP_DIRECT	GO:0010803	regulation of tumor necrosis factor-mediated signaling pathway	0.0106732	TNF, CASP8
GOTERM_BP_DIRECT	GO:0071392	cellular response to estradiol stimulus	0.0110273	EGFR, ESR1
GOTERM_BP_DIRECT	GO:0042059	negative regulation of epidermal growth factor receptor signaling pathway	0.0127964	EGFR, EGF
GOTERM_BP_DIRECT	GO:0045893	positive regulation of transcription, DNA-templated	0.0129739	TNF, ESR1, EGF
GOTERM_BP_DIRECT	GO:0008625	extrinsic apoptotic signaling pathway via death domain receptors	0.0135033	TNF, NGF
GOTERM_BP_DIRECT	GO:0038128	ERBB2 signaling pathway	0.0135033	EGFR, EGF
GOTERM_BP_DIRECT	GO:0043124	negative regulation of I-kappaB kinase/NF-kappaB signaling	0.0142098	CASP8, ESR1
GOTERM_BP_DIRECT	GO:0097191	extrinsic apoptotic signaling pathway	0.0149158	TNF, CASP8
GOTERM_BP_DIRECT	GO:0071230	cellular response to amino acid stimulus	0.0166791	EGFR, TNF
GOTERM_BP_DIRECT	GO:0008630	intrinsic apoptotic signaling pathway in response to DNA damage	0.0166791	TNF, ATM
GOTERM_BP_DIRECT	GO:0048812	neuron projection morphogenesis	0.0170314	EGFR, NGF
GOTERM_BP_DIRECT	GO:0048146	positive regulation of fibroblast proliferation	0.0191433	EGFR, ESR1
GOTERM_BP_DIRECT	GO:0007173	epidermal growth factor receptor signaling pathway	0.0198464	EGFR, EGF
GOTERM_BP_DIRECT	GO:0071407	cellular response to organic cyclic compound	0.0209002	TNF, CASP8
GOTERM_BP_DIRECT	GO:0048661	positive regulation of smooth muscle cell proliferation	0.0212513	EGFR, TNF
GOTERM_BP_DIRECT	GO:0071260	cellular response to mechanical stimulus	0.0251063	EGFR, CASP8
GOTERM_BP_DIRECT	GO:0014066	regulation of phosphatidylinositol 3-kinase signaling	0.0275528	EGFR, EGF
GOTERM_BP_DIRECT	GO:0051897	positive regulation of protein kinase B signaling	0.0296458	EGFR, TNF
GOTERM_BP_DIRECT	GO:0032355	response to estradiol	0.0320828	CASP8, ESR1
GOTERM_BP_DIRECT	GO:0046854	phosphatidylinositol phosphorylation	0.0331257	EGFR, EGF
GOTERM_BP_DIRECT	GO:0007169	transmembrane receptor protein tyrosine kinase signaling pathway	0.0338205	EGFR, NGF
GOTERM_BP_DIRECT	GO:0051091	positive regulation of sequence-specific DNA binding transcription factor activity	0.0369417	TNF, ESR1
GOTERM_BP_DIRECT	GO:0000187	activation of MAPK activity	0.0376341	TNF, EGF
GOTERM_BP_DIRECT	GO:0045944	positive regulation of transcription from RNA polymerase II promoter	0.0436981	EGFR, TNF, ESR1
GOTERM_BP_DIRECT	GO:0001934	positive regulation of protein phosphorylation	0.0445358	EGFR, TNF
GOTERM_BP_DIRECT	GO:0010629	negative regulation of gene expression	0.0479712	TNF, ESR1
GOTERM_BP_DIRECT	GO:0018108	peptidyl-tyrosine phosphorylation	0.0534464	EGFR, EGF
GOTERM_BP_DIRECT	GO:0006260	DNA replication	0.054129	EGF, ATM
GOTERM_BP_DIRECT	GO:0043123	positive regulation of I-kappaB kinase/NF-kappaB signaling	0.0561741	TNF, CASP8
GOTERM_BP_DIRECT	GO:0046777	protein autophosphorylation	0.0599141	EGFR, ATM
GOTERM_BP_DIRECT	GO:0070374	positive regulation of ERK1 and ERK2 cascade	0.0609319	EGFR, TNF
GOTERM_BP_DIRECT	GO:0010628	positive regulation of gene expression	0.0900523	TNF, NGF
GOTERM_BP_DIRECT	GO:0007166	cell surface receptor signaling pathway	0.0940092	EGFR, CASP8
GOTERM_CC_DIRECT	GO:0045121	membrane raft	0.0018512	EGFR, TNF, CASP8
GOTERM_CC_DIRECT	GO:0043235	receptor complex	0.0410968	EGFR, EGF
GOTERM_CC_DIRECT	GO:0016023	cytoplasmic, membrane-bounded vesicle	0.0445891	ATM, NGF
GOTERM_CC_DIRECT	GO:0005615	extracellular space	0.0670587	EGFR, TNF, EGF
GOTERM_CC_DIRECT	GO:0005768	endosome	0.0718385	EGFR, NGF
GOTERM_CC_DIRECT	GO:0005576	extracellular region	0.0920783	TNF, EGF, NGF
GOTERM_MF_DIRECT	GO:0042802	identical protein binding	0.00157324	EGFR, TNF, CASP8, ESR1
GOTERM_MF_DIRECT	GO:0030235	nitric-oxide synthase regulator activity	0.00284049	EGFR, ESR1
GOTERM_MF_DIRECT	GO:0005164	tumor necrosis factor receptor binding	0.0102648	TNF, CASP8
GOTERM_MF_DIRECT	GO:0005515	protein binding	0.0198475	EGFR, TNF, CASP8, ESR1, EGF, ATM, NGF
GOTERM_MF_DIRECT	GO:0046934	phosphatidylinositol-4,5-bisphosphate 3-kinase activity	0.0218385	EGFR, EGF
GOTERM_MF_DIRECT	GO:0005088	Ras guanyl-nucleotide exchange factor activity	0.0401904	EGFR, EGF
GOTERM_MF_DIRECT	GO:0004713	protein tyrosine kinase activity	0.0463574	EGFR, EGF
GOTERM_MF_DIRECT	GO:0008083	growth factor activity	0.0562238	EGF, NGF
GOTERM_MF_DIRECT	GO:0032403	protein complex binding	0.0710309	CASP8, ATM
GOTERM_MF_DIRECT	GO:0031625	ubiquitin protein ligase binding	0.0977834	EGFR, CASP8
